# Supplementary material for: Bimetallic layer-by-layer films and their application in catalytic hydrogenation of olefin
Source: Royal Society of Chemistry journal article supplement (doi:10.1039/c5qi00008d), 2015-01-01
Supplement: c5qi00008d1.pdf [file c5qi00008d1.pdf]

## Bimetallic layer-by-layer films and their application in catalytic hydrogenation of olefin

Shuiying Gao, Weijin Li, Rong Cao\*

State Key Laboratory of Structural Chemistry, Fujian Institute of Research on the  
Structure of Matter, the Chinese Academy of Sciences, Fuzhou 350002, China

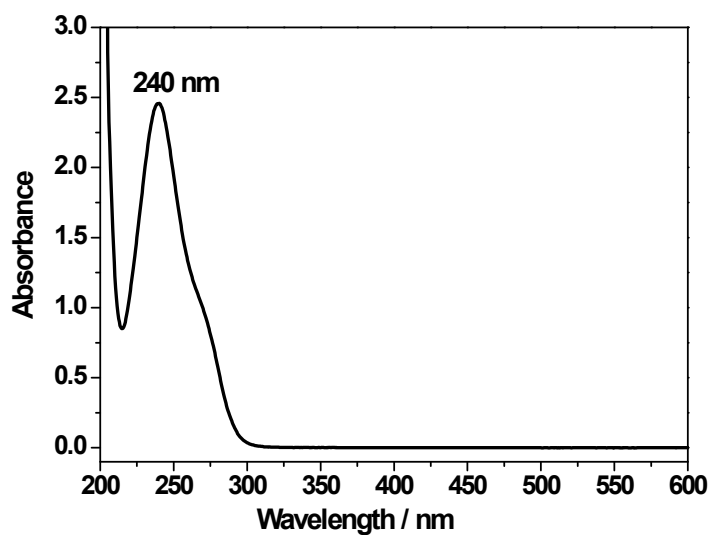

(a) ethanol solution of 4, 4'-bipyridyl (bpy)

- 
- To whom correspondence should be addressed. Phone: (+86 )591 63173998. Fax: (+86) 591 63173998. E-mail: [rcao@firms.ac.cn](mailto:rcao@firms.ac.cn) (R.Cao)

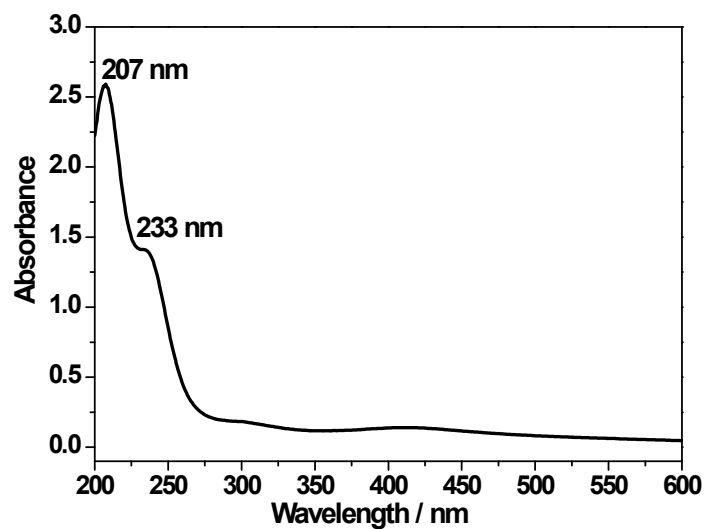

(b) aqueous  $K_2PdCl_4$  solution

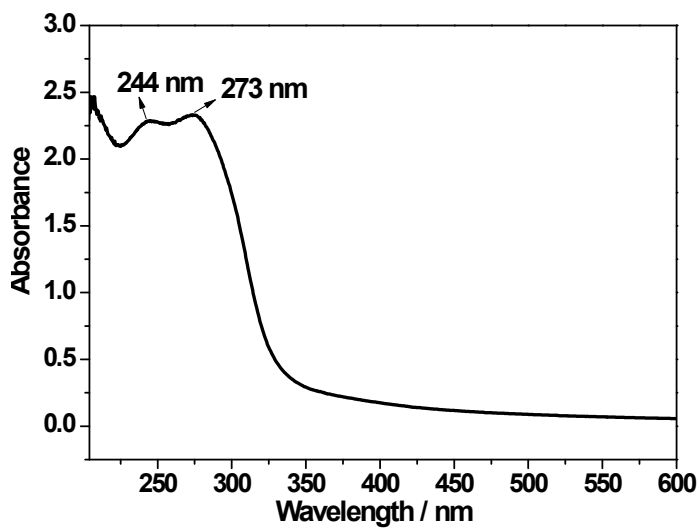

(c) 1 equiv of  $K_2PdCl_4$  and bpy

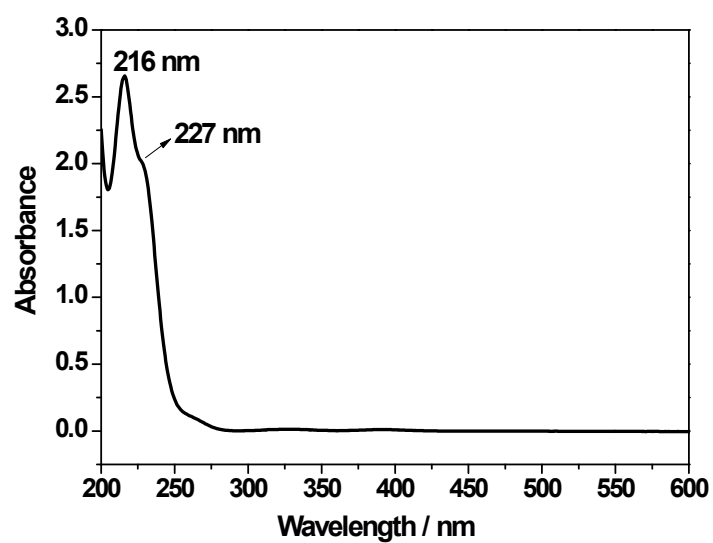

(d) aqueous  $K_2PtCl_4$  solution

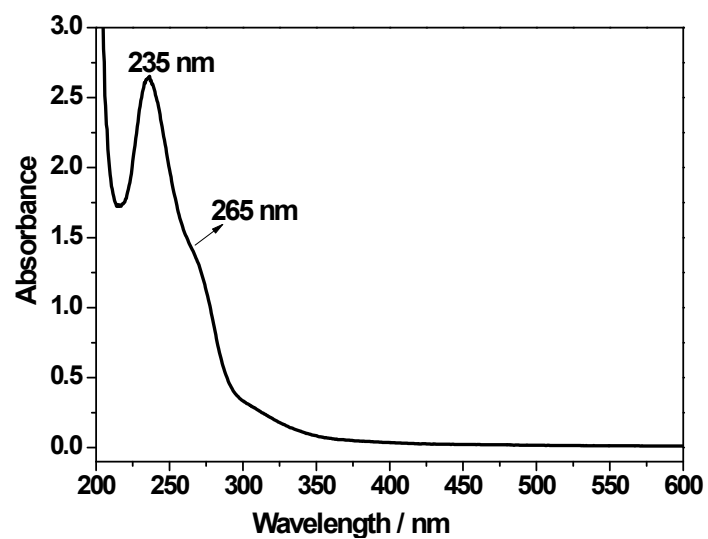

(e) 1 equiv of  $K_2PtCl_4$  and bpy

**Fig.S1** UV-vis spectra of the solutions
